# Supplementary material for: Prevalence of lead toxicity in adolescents in Kuwait
Source: Springer Nature journal article supplement (doi:10.1186/s12889-021-11210-z), 2021-06-22
Supplement: MOESM1 [file 19283456]

|  |                        |     |
|--|------------------------|-----|
|  | <b>Study ID number</b> | [ ] |
|--|------------------------|-----|

**Association of Vitamin D Levels with Cognitive Function and School Performance in School Children in Kuwait.**

**Parents' Form**

|  |                        |                        |
|--|------------------------|------------------------|
|  | <b>Study ID number</b> | [                    ] |
|--|------------------------|------------------------|

| No | Question                                                                | Categories                                                                                                                                                                                                                                                                                                                                     | Code |
|----|-------------------------------------------------------------------------|------------------------------------------------------------------------------------------------------------------------------------------------------------------------------------------------------------------------------------------------------------------------------------------------------------------------------------------------|------|
| Q1 | What is your relation to the student who is participating in the study? | <input type="checkbox"/> Father <sup>(1)</sup><br><input type="checkbox"/> Mother <sup>(2)</sup><br><input type="checkbox"/> Other relative <sup>(3)</sup> (specify): _____                                                                                                                                                                    |      |
| Q2 | In which governorate do you currently live?                             | <input type="checkbox"/> Capital <sup>(1)</sup><br><input type="checkbox"/> Hawally <sup>(2)</sup><br><input type="checkbox"/> Farawanya <sup>(3)</sup><br><input type="checkbox"/> Jahra <sup>(4)</sup><br><input type="checkbox"/> Mubarak Al-Kabeer <sup>(5)</sup><br><input type="checkbox"/> Ahmadi <sup>(6)</sup>                        |      |
| Q3 | What is the father's highest level of education completed?              | <input type="checkbox"/> No formal education <sup>(1)</sup><br><input type="checkbox"/> Completed primary school <sup>(2)</sup><br><input type="checkbox"/> Completed secondary school <sup>(3)</sup><br><input type="checkbox"/> Completed university <sup>(4)</sup><br><input type="checkbox"/> Higher than university degree <sup>(5)</sup> |      |
| Q4 | What is the mother's highest level of education completed?              | <input type="checkbox"/> No formal education <sup>(1)</sup><br><input type="checkbox"/> Completed primary school <sup>(2)</sup><br><input type="checkbox"/> Completed secondary school <sup>(3)</sup><br><input type="checkbox"/> Completed university <sup>(4)</sup><br><input type="checkbox"/> Higher than university degree <sup>(5)</sup> |      |
| Q5 | What is the father's current income per month?                          | <input type="checkbox"/> Less than 500 KD <sup>(1)</sup><br><input type="checkbox"/> 500 – 1000 KD <sup>(2)</sup><br><input type="checkbox"/> 1501 – 2000 KD <sup>(3)</sup><br><input type="checkbox"/> More than 2000 KD <sup>(4)</sup><br><input type="checkbox"/> Don't know <sup>(5)</sup>                                                 |      |
| Q6 | What is the current employment status of the mother?                    | <input type="checkbox"/> Housewife <sup>(1)</sup> → skip to Q8<br><input type="checkbox"/> Paid employed <sup>(2)</sup><br><input type="checkbox"/> Other <sup>(3)</sup> (specify): _____                                                                                                                                                      |      |
| Q7 | What is the mother's current income per month?                          | <input type="checkbox"/> Less than 500 KD <sup>(1)</sup><br><input type="checkbox"/> 500 – 1000 KD <sup>(2)</sup><br><input type="checkbox"/> 1501 – 2000 KD <sup>(3)</sup><br><input type="checkbox"/> More than 2000 KD <sup>(4)</sup><br><input type="checkbox"/> Don't know <sup>(5)</sup>                                                 |      |

|  |                        |                        |
|--|------------------------|------------------------|
|  | <b>Study ID number</b> | [                    ] |
|--|------------------------|------------------------|

| No  | Question                                                                                                              | Categories                                                                                                                                                                                                                                                                                                                                                     | Code |
|-----|-----------------------------------------------------------------------------------------------------------------------|----------------------------------------------------------------------------------------------------------------------------------------------------------------------------------------------------------------------------------------------------------------------------------------------------------------------------------------------------------------|------|
| Q8  | Do you currently live in:                                                                                             | <input type="checkbox"/> Rented flat? <sup>(1)</sup><br><input type="checkbox"/> Rented house? <sup>(2)</sup><br><input type="checkbox"/> Owned flat? <sup>(3)</sup><br><input type="checkbox"/> Owned house? <sup>(4)</sup>                                                                                                                                   |      |
| Q9  | How many brothers and sisters does your son/daughter (who is participating in the study) have currently?              | <input type="checkbox"/> Brother: _____<br><input type="checkbox"/> Sisters: _____                                                                                                                                                                                                                                                                             | _ _  |
| Q10 | Does your son/daughter (who is participating in the study) have his/her own room?                                     | <input type="checkbox"/> Yes(1)<br><input type="checkbox"/> No(2)                                                                                                                                                                                                                                                                                              |      |
| Q11 | What is the birth order of your son/daughter (who is participating in the study) from his/her mother?                 | <input type="checkbox"/> First child (1)<br><input type="checkbox"/> Second child (2)<br><input type="checkbox"/> Third child (3)<br><input type="checkbox"/> Fourth child (4)<br><input type="checkbox"/> Fifth child or more(5)                                                                                                                              |      |
| Q12 | Does anyone smokes cigarettes inside your home?<br>(Don't consider those who smoke cigarettes only outside your home) | <input type="checkbox"/> No(0)<br><input type="checkbox"/> Yes(1) (who): _____<br>e.g. father, mother, brother                                                                                                                                                                                                                                                 |      |
| Q13 | Does anyone smokes Shisha inside your home?<br>(Don't consider those who smoke Shisha only outside your home)         | <input type="checkbox"/> No(0)<br><input type="checkbox"/> Yes(1) (who): _____<br>e.g. father, mother, brother                                                                                                                                                                                                                                                 |      |
| Q14 | On a typical week, how often does your child have a meal before going to the school?                                  | <input type="checkbox"/> Every day/5 days per week <sup>(1)</sup><br><input type="checkbox"/> 4 days per week <sup>(2)</sup><br><input type="checkbox"/> 3 days per week <sup>(3)</sup><br><input type="checkbox"/> 2 days per week <sup>(4)</sup><br><input type="checkbox"/> 1 days per week <sup>(5)</sup><br><input type="checkbox"/> Never <sup>(6)</sup> | _    |

**Q15. During the past 3 months, how many times each week (including weekdays and weekends) has your son/daughter (who participated in the study) eaten breakfast not prepared at home?**

- <sub>0</sub> Never or almost never
- <sub>1</sub> 1-2 times per week
- <sub>2</sub> 3-4 times per week
- <sub>3</sub> 5 or more times per week

|  |                        |     |
|--|------------------------|-----|
|  | <b>Study ID number</b> | [ ] |
|--|------------------------|-----|

**Q16. During the past 3 months, how many times each week (including weekdays and weekends) has your son/daughter (who participated in the study) eaten lunch not prepared at home?**

- <sub>0</sub> Never or almost never
- <sub>1</sub> 1-2 times per week
- <sub>2</sub> 3-4 times per week
- <sub>3</sub> 5 or more times per week

**Q17. During the past 3 months, how many times each week (including weekdays and weekends) has your son/daughter (who participated in the study) eaten dinner not prepared at home?**

- <sub>0</sub> Never or almost never
- <sub>1</sub> 1-2 times per week
- <sub>2</sub> 3-4 times per week
- <sub>3</sub> 5 or more times per week

|  |                        |                          |
|--|------------------------|--------------------------|
|  | <b>Study ID number</b> | [                      ] |
|--|------------------------|--------------------------|

**Association of Vitamin D Levels with Cognitive Function and School Performance in School Children in Kuwait.**

**Student's Form**

|                                             |                                                                                                                                                                                                                                                                                                             |
|---------------------------------------------|-------------------------------------------------------------------------------------------------------------------------------------------------------------------------------------------------------------------------------------------------------------------------------------------------------------|
| <b>Today date:</b>                          | ----/--/-----                                                                                                                                                                                                                                                                                               |
| <b>Child's name:</b>                        | : .....                                                                                                                                                                                                                                                                                                     |
| <b>Civil ID:</b>                            | : .....                                                                                                                                                                                                                                                                                                     |
| <b>School's name:</b>                       | : ..... <b>Code:</b> -----                                                                                                                                                                                                                                                                                  |
| <b>Telephone number:</b>                    | <b>Home number:</b> -----<br><b>Mother's mobile:</b> -----<br><b>Father's mobile:</b> -----                                                                                                                                                                                                                 |
| <b>School's Address:</b>                    | : .....<br>.....<br>.....<br>.....<br>.....                                                                                                                                                                                                                                                                 |
| <b>School's Governorate:</b>                | <input type="checkbox"/> Capital <sup>(1)</sup> <input type="checkbox"/> Hawally <sup>(2)</sup> <input type="checkbox"/> Farawanya <sup>(3)</sup><br><input type="checkbox"/> Jahra <sup>(4)</sup> <input type="checkbox"/> Mubarak Al-Kabeer <sup>(5)</sup> <input type="checkbox"/> Ahmadi <sup>(6)</sup> |
| <b>Number of the students in the school</b> |                                                                                                                                                                                                                                                                                                             |
| <b>Study ID number:</b>                     | .....                                                                                                                                                                                                                                                                                                       |

|  |                        |                        |
|--|------------------------|------------------------|
|  | <b>Study ID number</b> | [                    ] |
|--|------------------------|------------------------|

| No  | Question                                                                                                                      | Categories                                                                                                                                                                                                                                                                                                 | Code |
|-----|-------------------------------------------------------------------------------------------------------------------------------|------------------------------------------------------------------------------------------------------------------------------------------------------------------------------------------------------------------------------------------------------------------------------------------------------------|------|
| Q1  | Gender                                                                                                                        | <input type="checkbox"/> Male <sup>(1)</sup><br><input type="checkbox"/> Female <sup>(2)</sup>                                                                                                                                                                                                             |      |
| Q2  | What is your current nationality?                                                                                             | <input type="checkbox"/> Kuwaiti <sup>(1)</sup><br><input type="checkbox"/> Non-Kuwaiti Arab <sup>(2)</sup> (specify): _____<br><input type="checkbox"/> Non-Kuwaiti non-Arab <sup>(3)</sup> (specify): _____                                                                                              |      |
| Q3  | What is your Date of Birth?                                                                                                   | DD      MM      YY<br>____/____/____/                                                                                                                                                                                                                                                                      |      |
| Q4  | Which grade are you currently in?                                                                                             | _____e.g. sixth, seventh                                                                                                                                                                                                                                                                                   |      |
| Q5  | Who do you currently live with?                                                                                               | <input type="checkbox"/> Father and mother <sup>(1)</sup><br><input type="checkbox"/> Mother but not with the father <sup>(2)</sup><br><input type="checkbox"/> Father but not with the mother <sup>(3)</sup><br><input type="checkbox"/> Other relatives but not with the father or mother <sup>(4)</sup> |      |
| Q6  | Does your father, mother or any family member helps you in your study? E.g. doing homework, understanding difficult subjects. | <input type="checkbox"/> Yes, regularly <sup>(1)</sup><br><input type="checkbox"/> Yes, sometimes <sup>(2)</sup><br><input type="checkbox"/> Yes, rarely <sup>(3)</sup><br><input type="checkbox"/> No <sup>(4)</sup>                                                                                      |      |
| Q7  | Do you have personal tutor to help you in your study?                                                                         | <input type="checkbox"/> No <sup>(0)</sup><br><input type="checkbox"/> Yes <sup>(1)</sup> (In which subjects): _____<br>e.g. Math, Science, Arabic literature..etc                                                                                                                                         |      |
| Q8  | Do you currently use any medications or supplements like vitamins?                                                            | <input type="checkbox"/> No <sup>(0)</sup><br><input type="checkbox"/> Yes <sup>(1)</sup> (specify): _____                                                                                                                                                                                                 |      |
| Q9  | Does anyone smoke cigarettes inside your home?<br>(Don't consider those who smoke cigarettes only outside your home)          | <input type="checkbox"/> No <sup>(0)</sup><br><input type="checkbox"/> Yes <sup>(1)</sup> (who?): _____<br>e.g. father, mother, brother                                                                                                                                                                    |      |
| Q10 | Does anyone smoke Shisha inside your home?<br>(Don't consider those who smoke Shisha only outside your home)                  | <input type="checkbox"/> No <sup>(0)</sup><br><input type="checkbox"/> Yes <sup>(1)</sup> (who?): _____<br>e.g. father, mother, brother                                                                                                                                                                    |      |
| Q11 | Do you currently smoke cigarettes?                                                                                            | <input type="checkbox"/> No <sup>(0)</sup><br><input type="checkbox"/> Yes <sup>(1)</sup> (How many cigarettes per day?): _____                                                                                                                                                                            |      |
| Q12 | Do you currently smoke Shisha?                                                                                                | <input type="checkbox"/> No <sup>(0)</sup><br><input type="checkbox"/> Yes <sup>(1)</sup> (How many times per week?): _____                                                                                                                                                                                |      |
| Q13 | In a typical weekday (Sunday-Thursday), how many hours do you sleep during the night?                                         | Probe by asking about the time going to bed, falling asleep and awakening in the morning and going school. _____hours                                                                                                                                                                                      |      |
| Q14 | In a typical weekday (Sunday-Thursday), do you sleep during day-time?                                                         | <input type="checkbox"/> No <sup>(0)</sup><br><input type="checkbox"/> Yes <sup>(1)</sup> (How many hours per day?): _____                                                                                                                                                                                 |      |

| No  | Question                                                                                                                                               | Categories                                                                                                                                                                                                                                                                                                                                                                                                       | Code |
|-----|--------------------------------------------------------------------------------------------------------------------------------------------------------|------------------------------------------------------------------------------------------------------------------------------------------------------------------------------------------------------------------------------------------------------------------------------------------------------------------------------------------------------------------------------------------------------------------|------|
| Q15 | In a typical weekend (Friday-Saturday), how many hours do you sleep during the night?                                                                  | Probe by asking about the time going to bed, falling asleep and awakening in the morning and having breakfast or going out. _____ hours                                                                                                                                                                                                                                                                          |      |
| Q16 | In a typical weekend (Friday-Saturday), do you sleep during day-time?                                                                                  | <input type="checkbox"/> No <sup>(0)</sup><br><input type="checkbox"/> Yes <sup>(1)</sup> (On average how many hours?): _____                                                                                                                                                                                                                                                                                    |      |
| Q17 | Do you have any health condition that limits your physical activity?                                                                                   | <input type="checkbox"/> No <sup>(0)</sup><br><input type="checkbox"/> Yes <sup>(1)</sup> (specify): _____                                                                                                                                                                                                                                                                                                       |      |
| Q18 | In school, how many times per week do you attend physical education classes?                                                                           | <input type="checkbox"/> None <sup>(0)</sup><br><input type="checkbox"/> Once <sup>(1)</sup><br><input type="checkbox"/> Twice <sup>(2)</sup><br><input type="checkbox"/> Three Times <sup>(3)</sup><br><input type="checkbox"/> Four Times <sup>(4)</sup><br><input type="checkbox"/> Five Times or more <sup>(5)</sup>                                                                                         |      |
| Q19 | During PAST WEEK, how many times did you walk to the school?<br>(Going and coming from school=2 times)                                                 | _____ Times<br>If none, put zero.                                                                                                                                                                                                                                                                                                                                                                                |      |
| Q20 | If you walked to the school, how many minutes you walk to reach the school?                                                                            | _____ Minutes                                                                                                                                                                                                                                                                                                                                                                                                    |      |
| Q21 | During PAST WEEK, how many times did you travel to the school by car or bus?                                                                           | _____ Times                                                                                                                                                                                                                                                                                                                                                                                                      |      |
| Q22 | Over the past 3-months, on average, how many hours are you outside per day between 10:00 am and 4:00 pm <b>on Weekdays (Sunday to Thursday)</b> ?      | <input type="checkbox"/> less than 30 minutes <sup>(0)</sup><br><input type="checkbox"/> 31 minutes to 1 hour <sup>(1)</sup><br><input type="checkbox"/> More than 1 hour to 2 hours <sup>(2)</sup><br><input type="checkbox"/> More than 2 hours to 3 hours <sup>(3)</sup><br><input type="checkbox"/> More than 3 hours to 4 hours <sup>(4)</sup><br><input type="checkbox"/> More than 4 hours <sup>(5)</sup> |      |
| Q23 | Over the past 3-months, on average, how many hours are you outside per day between 10:00 am and 4:00 pm <b>on Weekend days (Friday and Saturday)</b> ? | <input type="checkbox"/> less than 30 minutes <sup>(0)</sup><br><input type="checkbox"/> 31 minutes to 1 hour <sup>(1)</sup><br><input type="checkbox"/> More than 1 hour to 2 hours <sup>(2)</sup><br><input type="checkbox"/> More than 2 hours to 3 hours <sup>(3)</sup><br><input type="checkbox"/> More than 3 hours to 4 hours <sup>(4)</sup><br><input type="checkbox"/> More than 4 hours <sup>(5)</sup> |      |
| Q24 | In the past 12-months, how many times did you have a red or painful sunburn that lasted a day or more?                                                 | <input type="checkbox"/> None <sup>(0)</sup><br><input type="checkbox"/> One <sup>(1)</sup><br><input type="checkbox"/> Two <sup>(2)</sup><br><input type="checkbox"/> Three <sup>(3)</sup><br><input type="checkbox"/> Four <sup>(4)</sup><br><input type="checkbox"/> Five and more <sup>(5)</sup>                                                                                                             |      |

|  |                        |                          |
|--|------------------------|--------------------------|
|  | <b>Study ID number</b> | [                      ] |
|--|------------------------|--------------------------|

**Q25. For the following questions, think about what you do when you are outside during the past 3-months?**

|                                                                         | Never <sup>(0)</sup>     | Rarely <sup>(1)</sup>    | Sometimes <sup>(2)</sup> | Often <sup>(3)</sup>     | Always <sup>(4)</sup>    |
|-------------------------------------------------------------------------|--------------------------|--------------------------|--------------------------|--------------------------|--------------------------|
| a. How often do you wear sunscreen?                                     | <input type="checkbox"/> | <input type="checkbox"/> | <input type="checkbox"/> | <input type="checkbox"/> | <input type="checkbox"/> |
| b. How often do you wear a shirt with sleeves that cover your shoulder? | <input type="checkbox"/> | <input type="checkbox"/> | <input type="checkbox"/> | <input type="checkbox"/> | <input type="checkbox"/> |
| c. How often do you wear a hat?                                         | <input type="checkbox"/> | <input type="checkbox"/> | <input type="checkbox"/> | <input type="checkbox"/> | <input type="checkbox"/> |
| d. How often do you stay in the shade or under an umbrella?             | <input type="checkbox"/> | <input type="checkbox"/> | <input type="checkbox"/> | <input type="checkbox"/> | <input type="checkbox"/> |
| e. How often do you spend time in the sun in order to get a tan?        | <input type="checkbox"/> | <input type="checkbox"/> | <input type="checkbox"/> | <input type="checkbox"/> | <input type="checkbox"/> |

| No         | Question                                                                                                     | Categories                                                                                                                                                                                                                                                                                                                                                                                                           | Code |
|------------|--------------------------------------------------------------------------------------------------------------|----------------------------------------------------------------------------------------------------------------------------------------------------------------------------------------------------------------------------------------------------------------------------------------------------------------------------------------------------------------------------------------------------------------------|------|
| <b>Q26</b> | On a typical <b>Weekday (Sunday-Thursday)</b> at what time do you have your first meal?                      | <input type="checkbox"/> Before 7 am <sup>(0)</sup><br><input type="checkbox"/> 7-8 am <sup>(1)</sup><br><input type="checkbox"/> 8-9 am <sup>(2)</sup><br><input type="checkbox"/> 9-10 am <sup>(3)</sup><br><input type="checkbox"/> After 10 am <sup>(4)</sup>                                                                                                                                                    |      |
| <b>Q27</b> | On a typical <b>Weekend (Friday and Saturday)</b> at what time do you have your first meal?                  | <input type="checkbox"/> Before 7 am <sup>(0)</sup><br><input type="checkbox"/> 7-8 am <sup>(1)</sup><br><input type="checkbox"/> 8-9 am <sup>(2)</sup><br><input type="checkbox"/> 9-10 am <sup>(3)</sup><br><input type="checkbox"/> After 10 am <sup>(4)</sup>                                                                                                                                                    |      |
| <b>Q28</b> | How many times <b>per week</b> do you drink sugary drink/soft drinks (e.g. Coke, Pepsi, 7up, Sports drinks)? | <input type="checkbox"/> None <sup>(0)</sup><br><input type="checkbox"/> Once <sup>(1)</sup><br><input type="checkbox"/> Twice <sup>(2)</sup><br><input type="checkbox"/> 3 times <sup>(3)</sup><br><input type="checkbox"/> 4 times <sup>(4)</sup><br><input type="checkbox"/> 5 times <sup>(5)</sup><br><input type="checkbox"/> 6 times <sup>(6)</sup><br><input type="checkbox"/> 7 times or more <sup>(7)</sup> |      |



QUESTIONS 29- 32 for female students ONLY.

**Q29 Have you started your period yet?**

- 1 Yes → answer questions 30-32  
 2 No → skip to food frequency questionnaire

If yes:

**Q30** What was your age when your first period began? \_\_\_\_\_ years \_\_\_\_\_ months

**Q31** What was the date of your first period? \_\_\_\_\_ year \_\_\_\_\_ month \_\_\_\_\_ day

**Q32** In which school grade did your first period begin? \_\_\_\_\_

**Q33)** Choose the most picture that match the student's dress today.

1

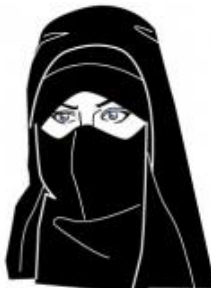

2

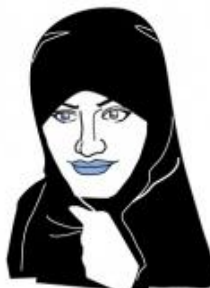

3

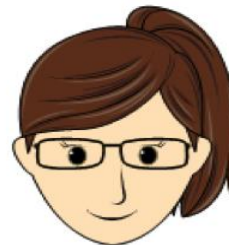

|  |                        |     |
|--|------------------------|-----|
|  | <b>Study ID number</b> | [ ] |
|--|------------------------|-----|

| <b>Anthropometric Measurements</b> |         |
|------------------------------------|---------|
| <b>Weight (Kgs):</b>               | _____kg |
| <b>Height (Cms):</b>               | _____cm |
| <b>Waist (Cms):</b>                | _____cm |

**The data below should be extracted from school's record:**

**Student's ID :**

|                         | <b>Mathematics</b>   | <b>Science</b>       | <b>Arabic Language</b> | <b>Total Mark</b>    |
|-------------------------|----------------------|----------------------|------------------------|----------------------|
| <b>Student's Marks:</b> | <input type="text"/> | <input type="text"/> | <input type="text"/>   | <input type="text"/> |
